# Supplementary material
Source: PubMed Central journal article supplement (PMC8220831)
Supplement: 40900_2021_285_MOESM1_ESM.pdf [file 40900_2021_285_MOESM1_ESM.pdf]

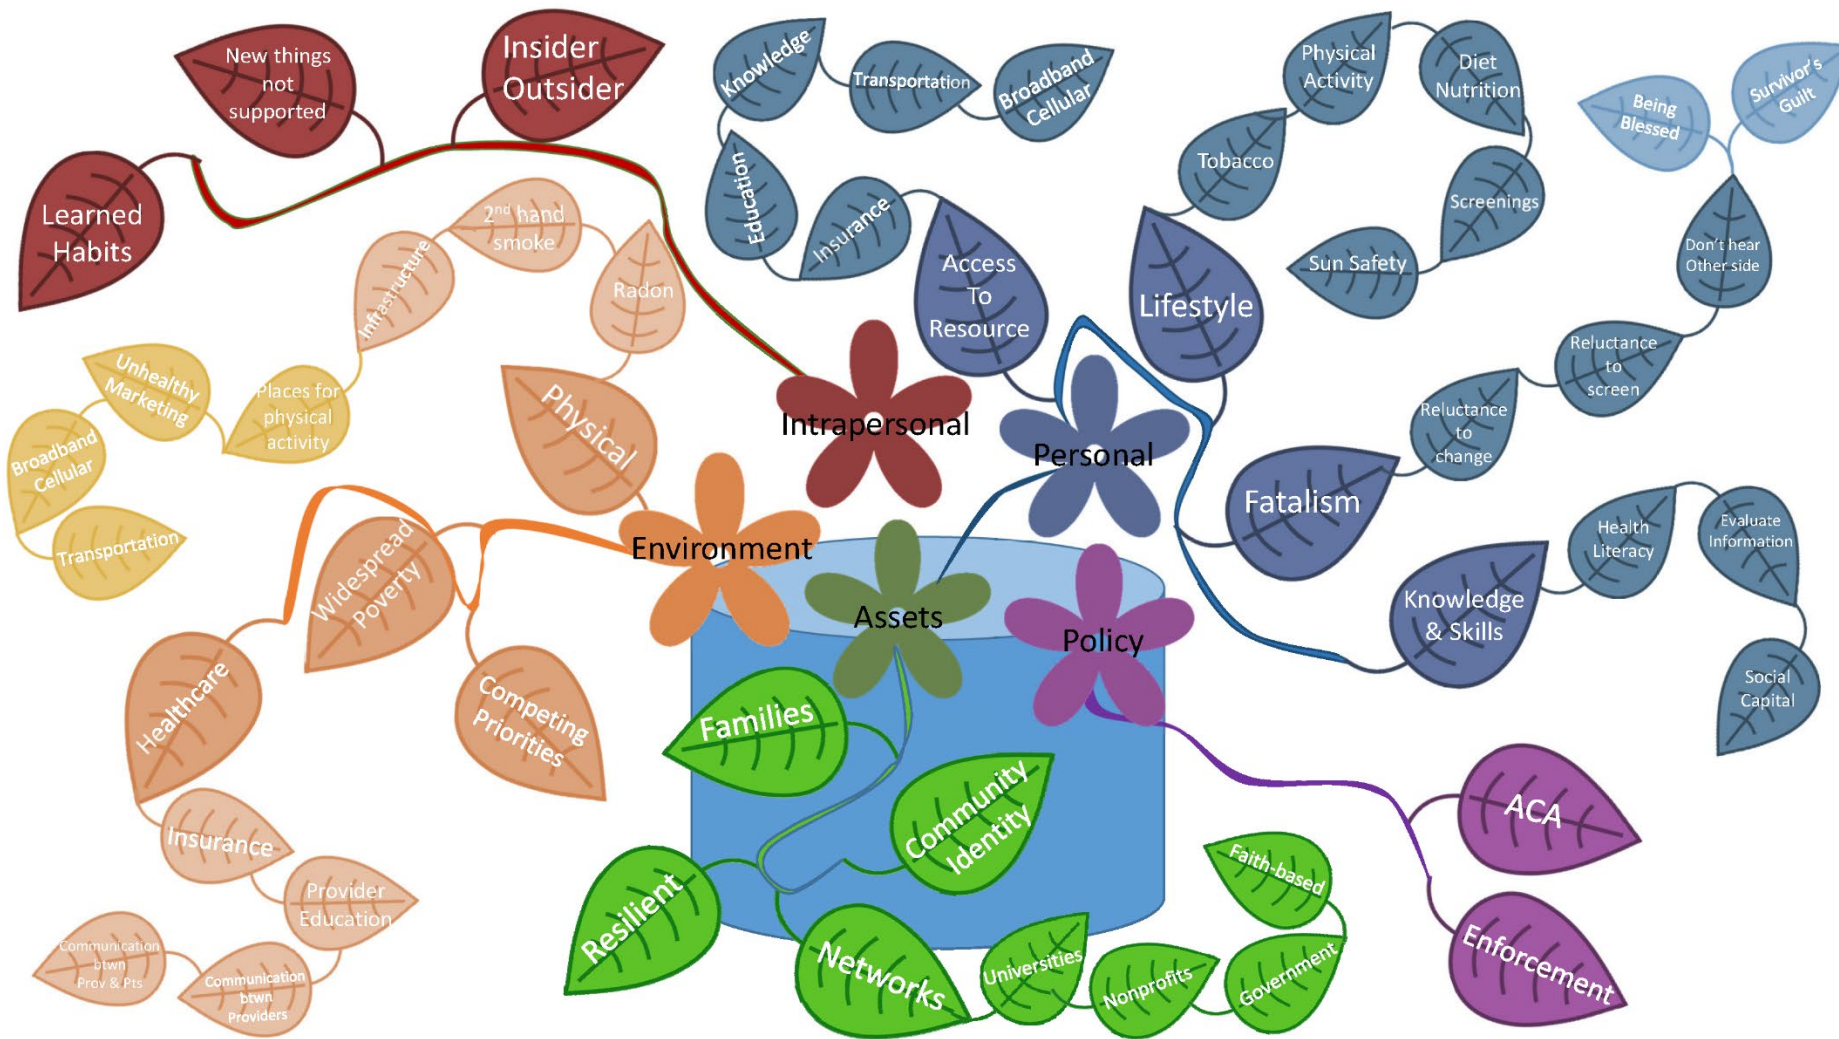

**Factors that influence Cancer Prevention:**

- Environmental Factors
- Intrapersonal Factors
- Personal Factors
- Policy Factors
- Assets (all levels) Factors
